# Supplementary material for: Micellar effects upon synthesis of 1,2-dihydro-1-arylnaphtho[1,2-e][1,3]oxazine-3-ones in water at room temperature
Source: Royal Society of Chemistry journal article supplement (doi:10.1039/d5ra08594b), 2026-05-19
Supplement: d5ra08594b1.pdf [file d5ra08594b1.pdf]

## Supporting information

### **Micellar effects upon synthesis of 1,2-Dihydro-1-arylnaphtho[1,2-e]- [1,3]oxazine-3-ones in water at room temperature**

Saeedeh Asadian, Mohsen Moradian\*, Javad Safari

*Department of Organic Chemistry, Faculty of Chemistry, University of Kashan, Kashan, P.O.  
Box 87317-51167, I. R.Iran*

**FT-IR and <sup>1</sup>H NMR spectra of synthesized compounds:**

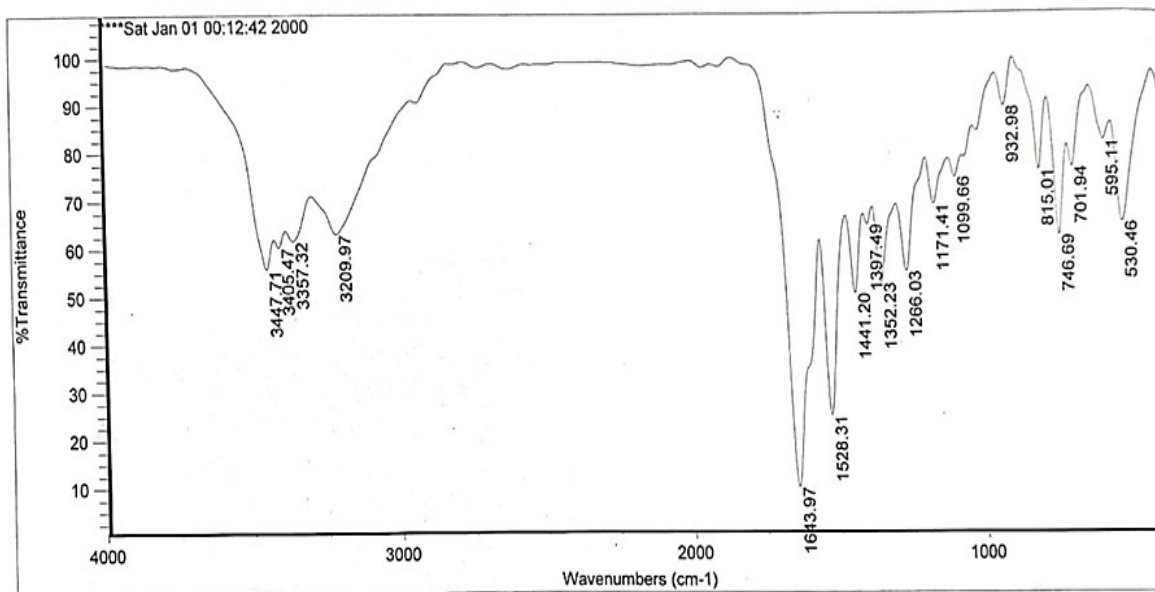

**Figure 1:** FT-IR spectrum of 1-Phenyl-1,2-dihydro-naphtho[1,2-e][1,3]oxazin-3-one (**4a**) in KBr.

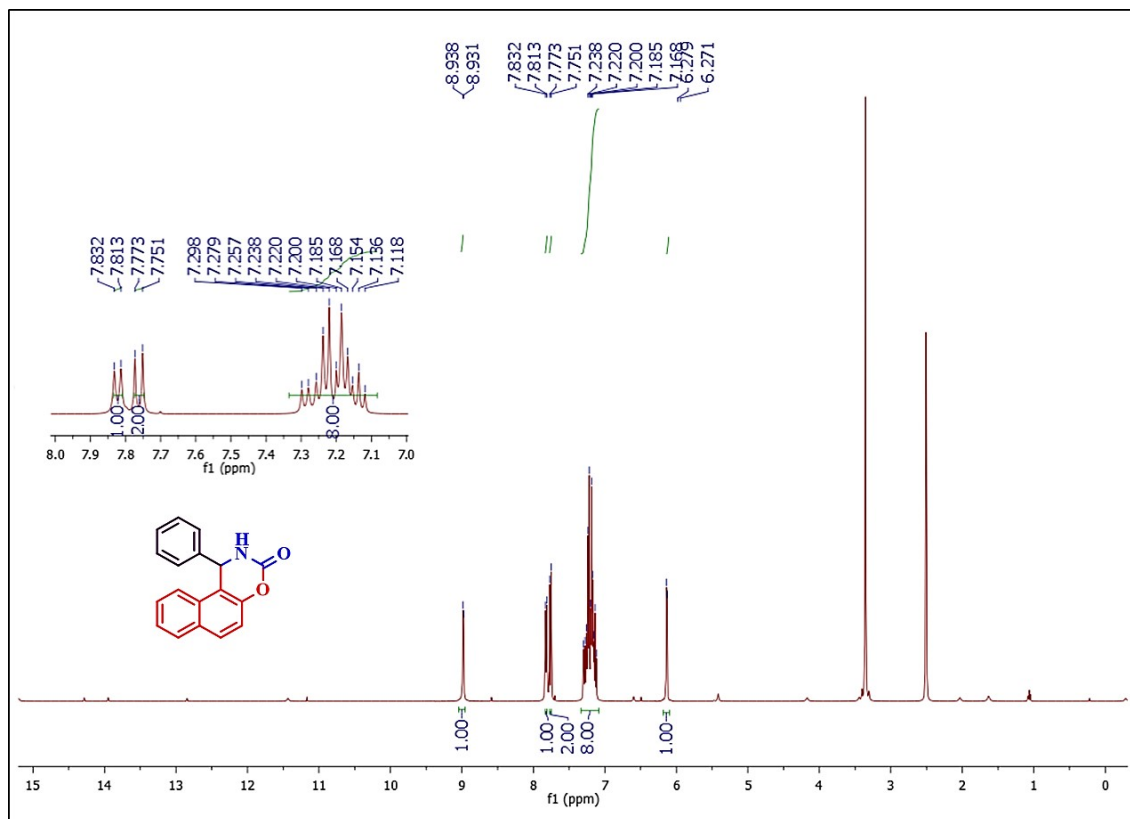

**Figure 2:** <sup>1</sup>H NMR spectrum (400 MHz) of 1-Phenyl-1,2-dihydro-naphtho[1,2-e][1,3]oxazin-3-one (**4a**) in DMSO.

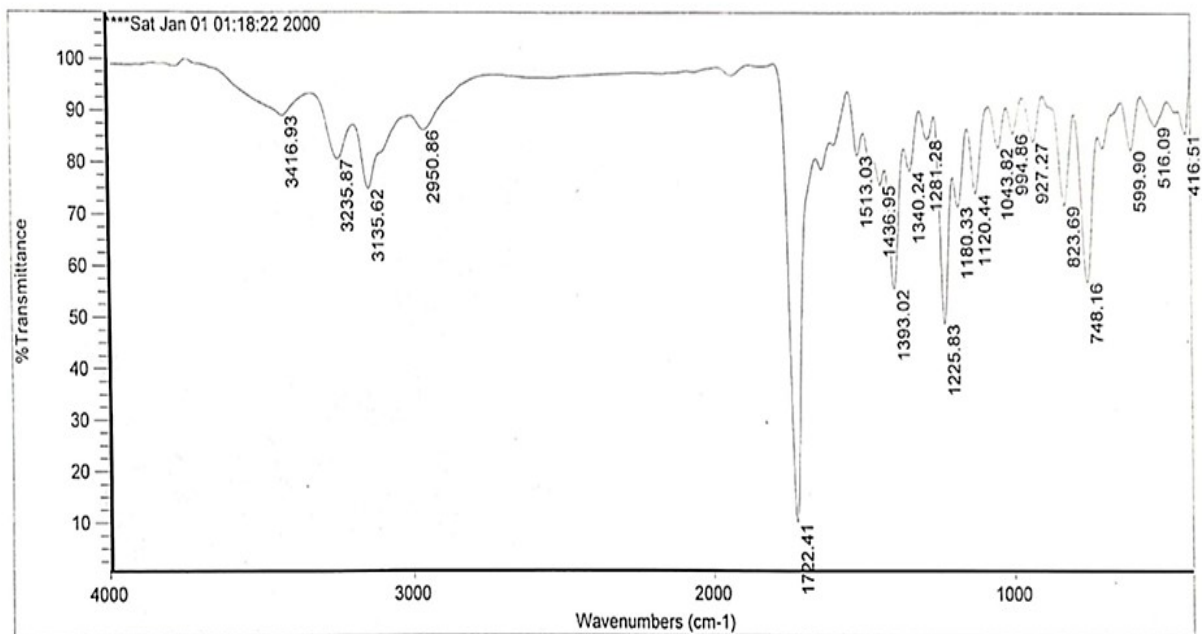

**Figure 3:** FT-IR spectrum 1-(4-Chlorophenyl)-1,2-dihydro-naphtho[1,2-e][1,3]oxazin-3-one (**4b**) in KBr.

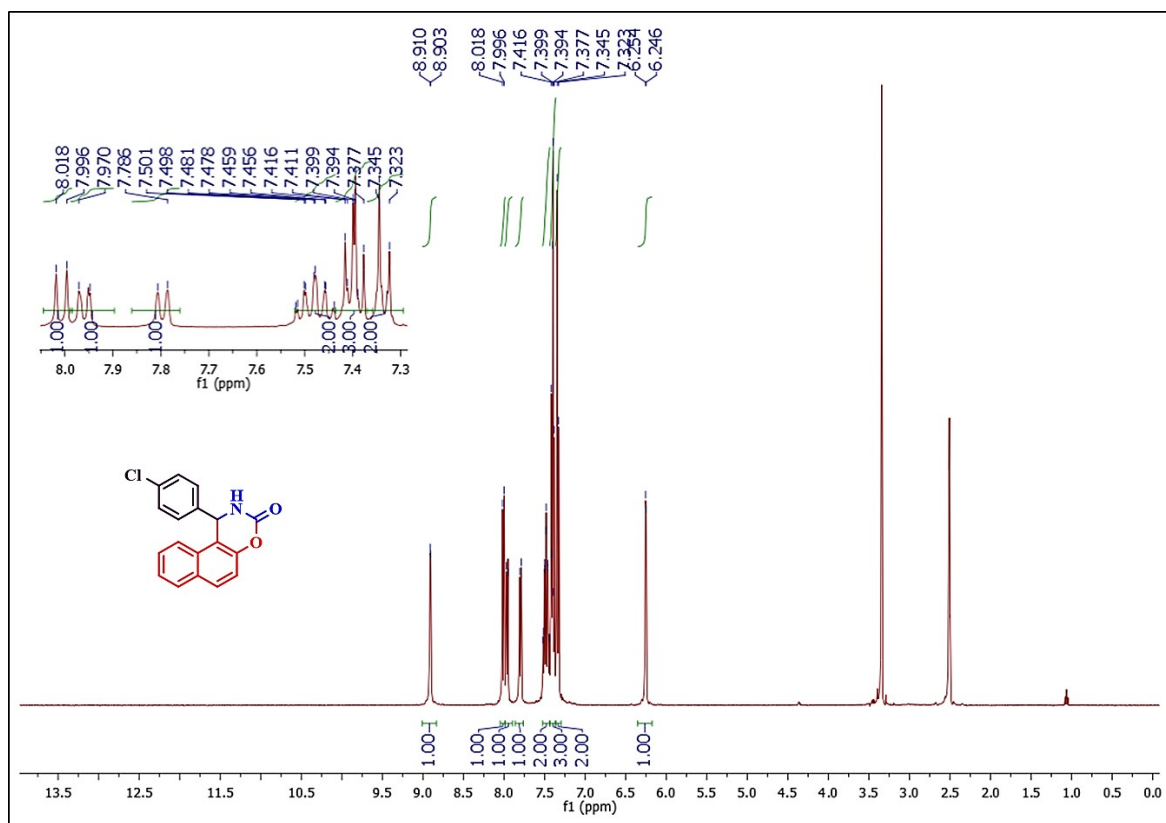

**Figure 4:**  $^1\text{H}$  NMR spectrum (400 MHz) of 1-(4-Chlorophenyl)-1,2-dihydro-naphtho[1,2-e][1,3]oxazin-3-one (**4b**) in DMSO.

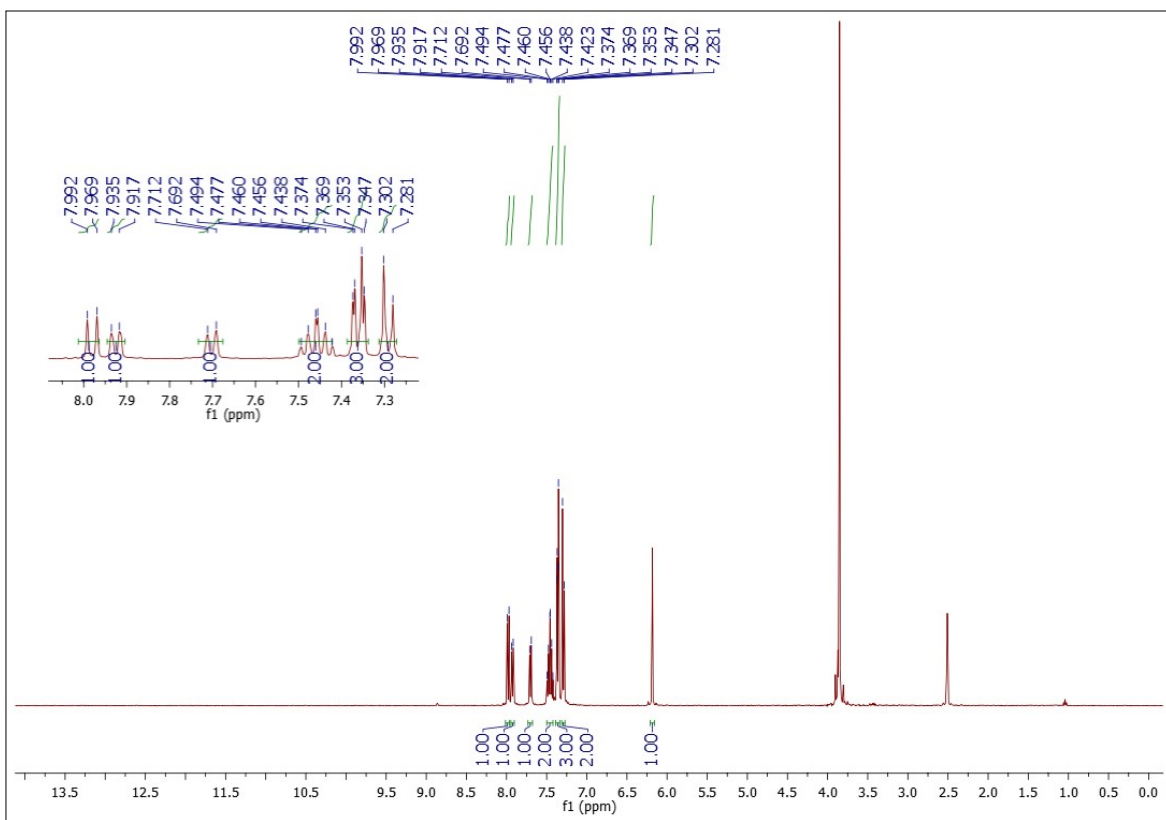

**Figure 5:**  $^1\text{H}$  NMR spectrum (400 MHz) of 1-(4-Chlorophenyl)-1,2-dihydro-naphtho[1,2-e][1,3]oxazin-3-one (**4b**) in  $\text{D}_2\text{O}$ .

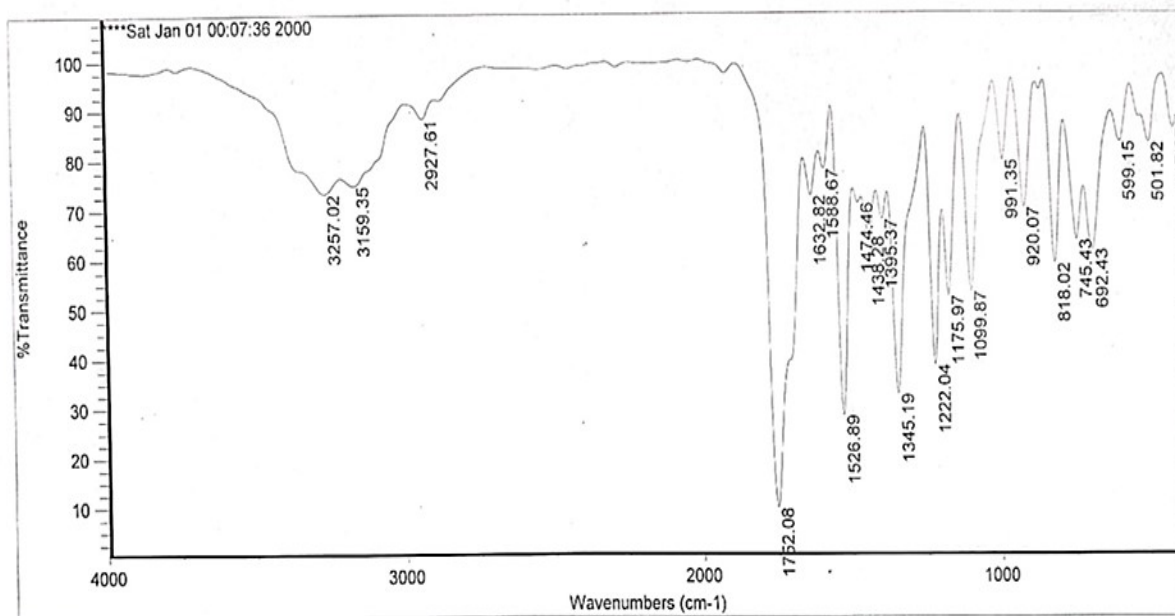

**Figure 6:** FT-IR spectrum of 1-(2-Nitrophenyl)-1,2-dihydro-naphtho[1,2-e][1,3]oxazin-3-one (**4c**) in KBr.

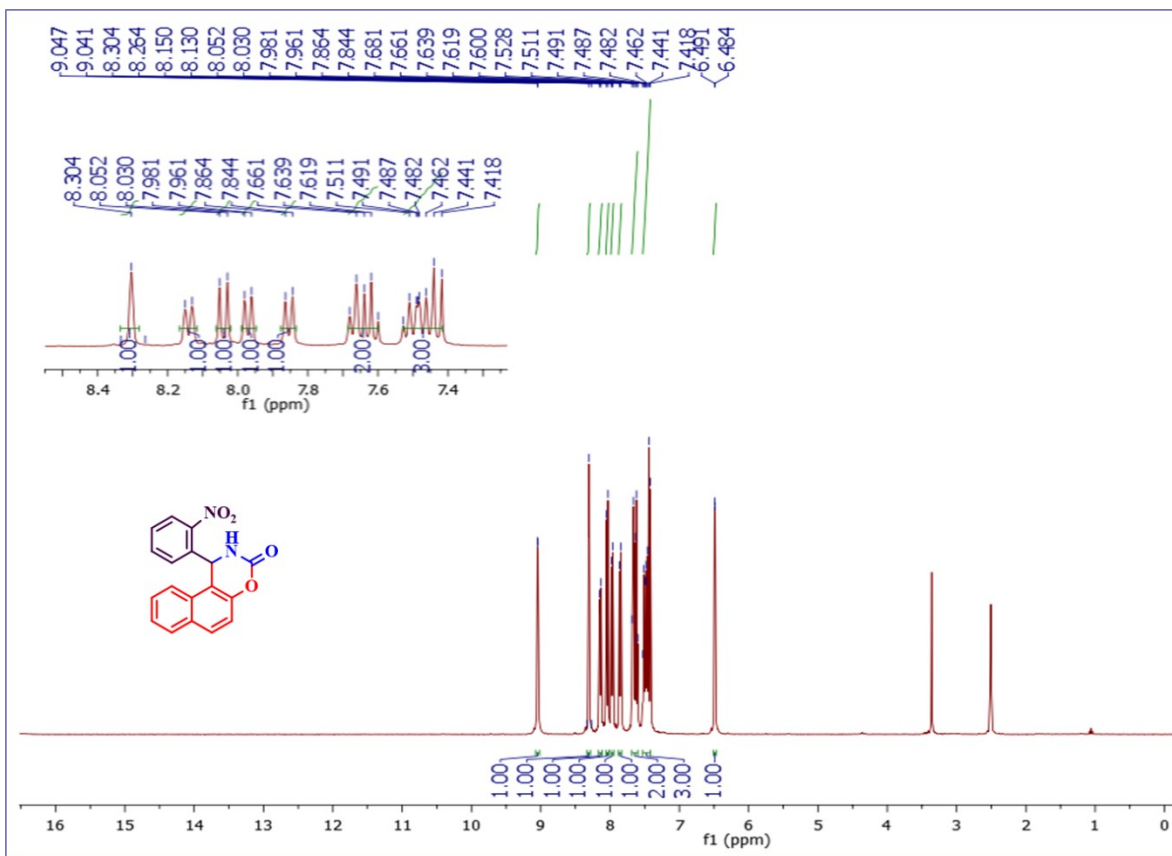

**Figure 7:**  $^1\text{H}$  NMR spectrum (400 MHz) of 1-(2-Nitrophenyl)-1,2-dihydro-naphtho[1,2-e][1,3]oxazin-3-one (**4c**) in DMSO.

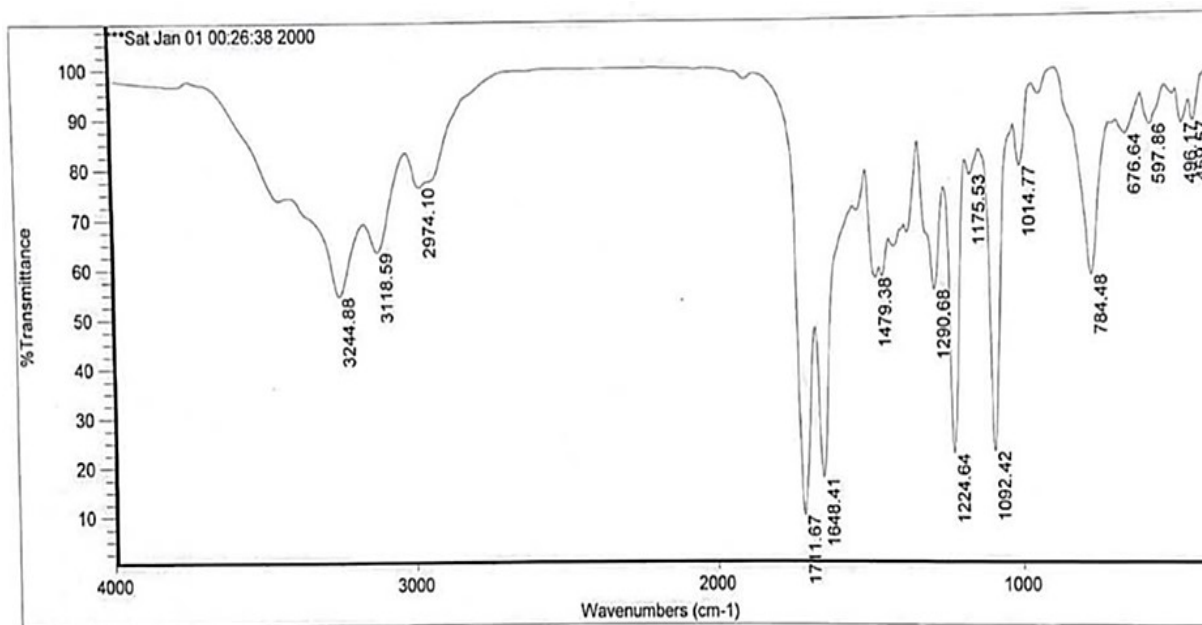

**Figure 8:** FT-IR spectrum of 1-(3-Chlorophenyl)-1,2-dihydro-naphtho[1,2-e][1,3]oxazin-3-one (**4d**) in KBr.

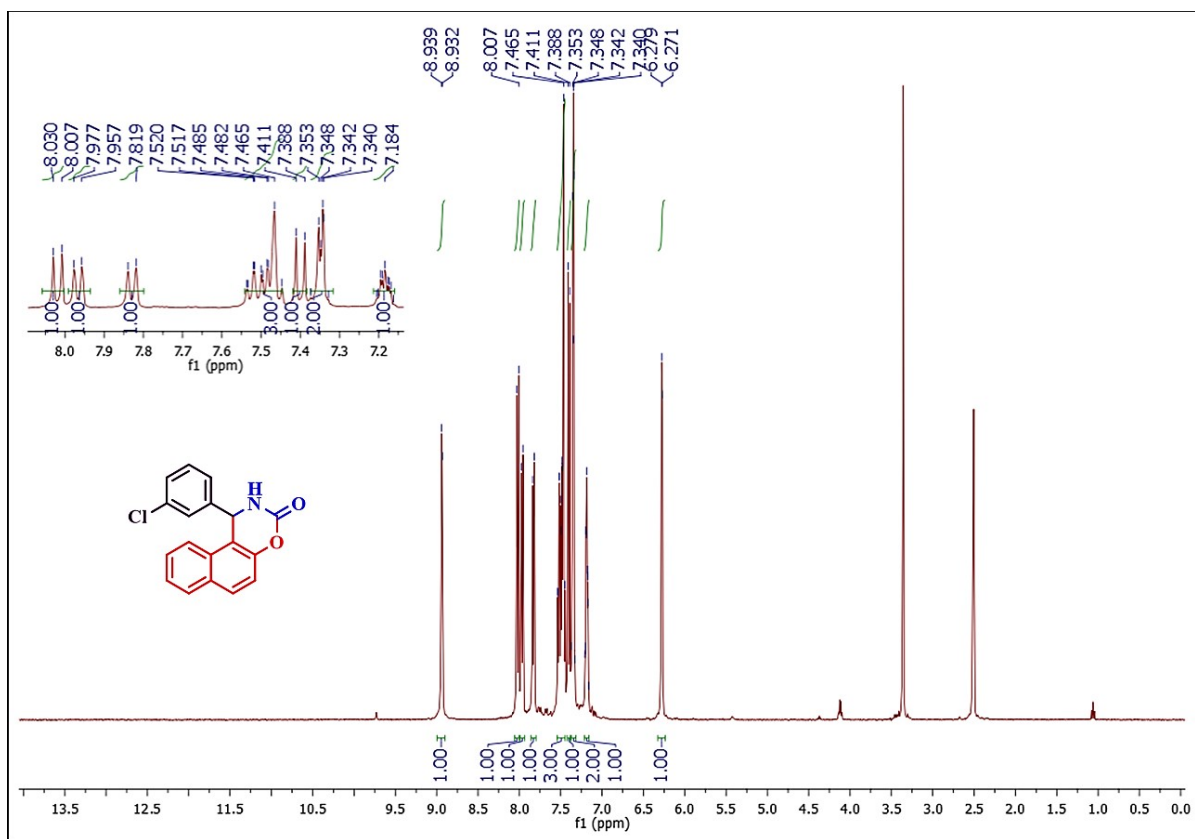

**Figure 9:** <sup>1</sup>H NMR spectrum (400 MHz) of 1-(3-chlorophenyl)-1,2-dihydro-naphtho[1,2-e][1,3]oxazin-3-one (4d) in DMSO.

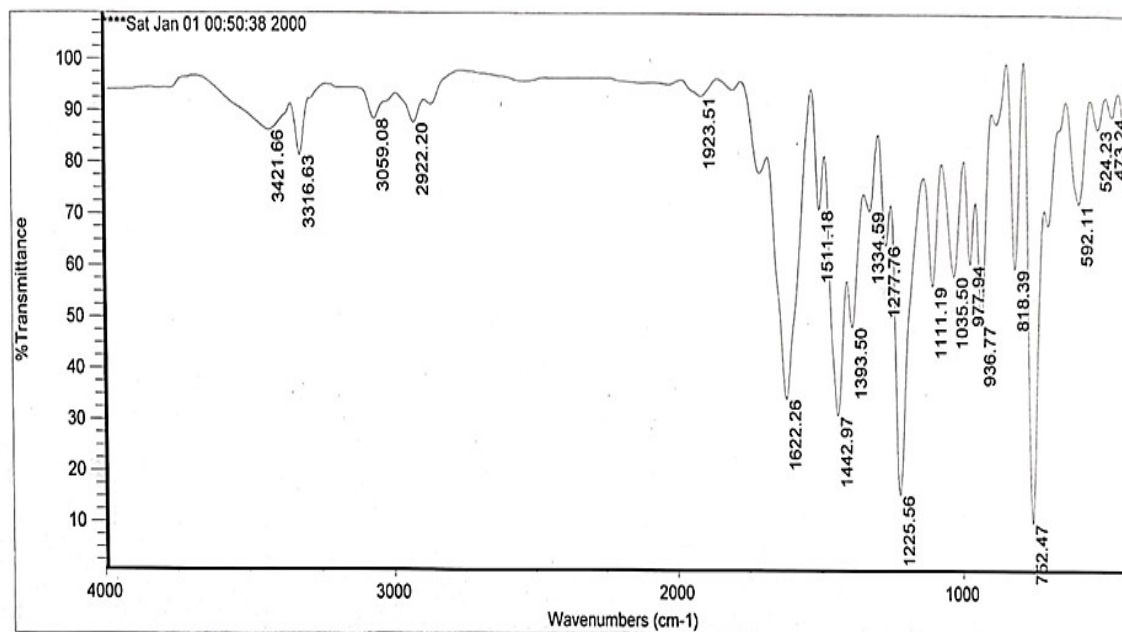

**Figure 10:** FT-IR spectrum of 1-(3-nitrophenyl)-1,2-dihydro-naphtho[1,2-e][1,3]oxazin-3-one (4e) in KBr.

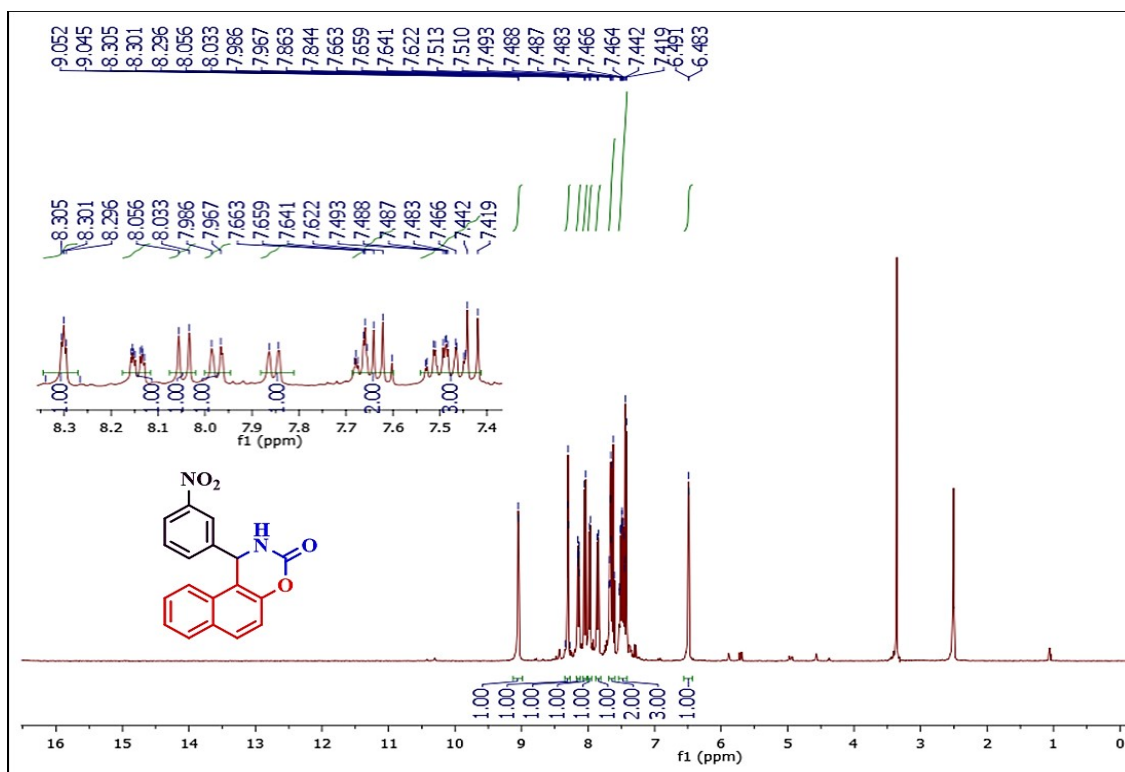

**Figure 11:** <sup>1</sup>H NMR spectrum (400 MHz) of 1-(3-nitrophenyl)-1,2-dihydronaphtho[1,2-e][1,3]oxazin-3-one (**4e**) in DMSO.

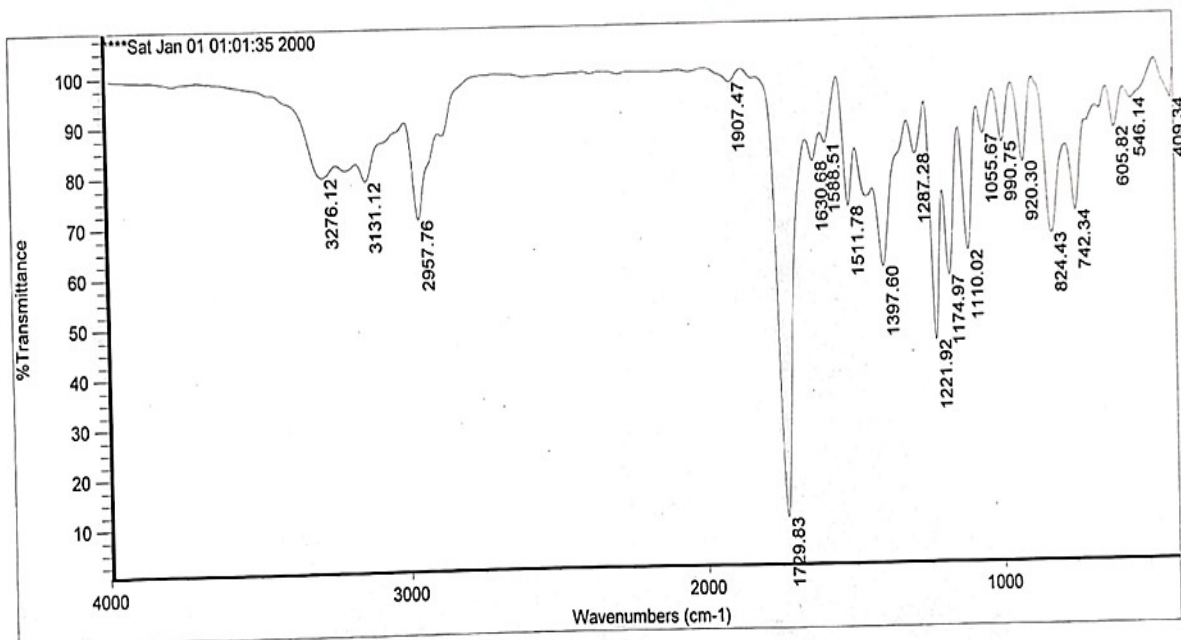

**Figure 12:** FT-IR spectrum of 1-(4-Iso-propylphenyl)-1,2-dihydro-naphtho[1,2-e][1,3]oxazin-3-one (**4f**) in KBr.

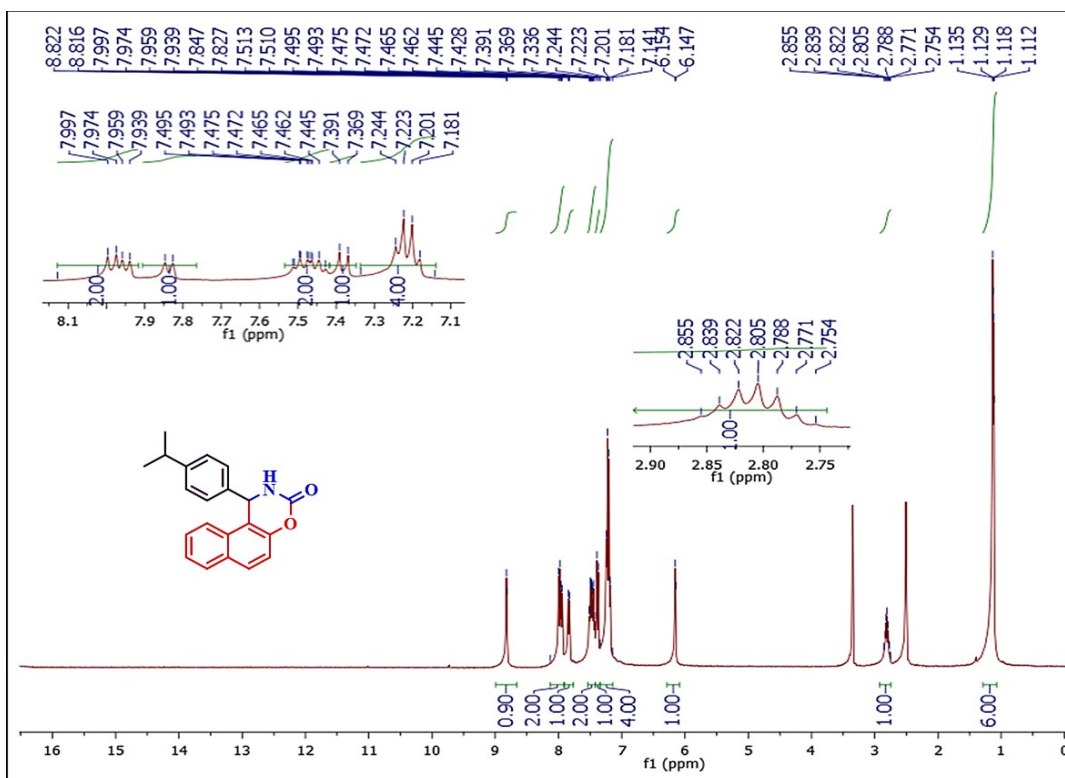

**Figure 13:**  $^1\text{H}$  NMR spectrum (400 MHz) of 1-(4-Iso-propylphenyl)-1,2-dihydro-naphtho[1,2-e][1,3]oxazin-3-one (**4f**) in DMSO.

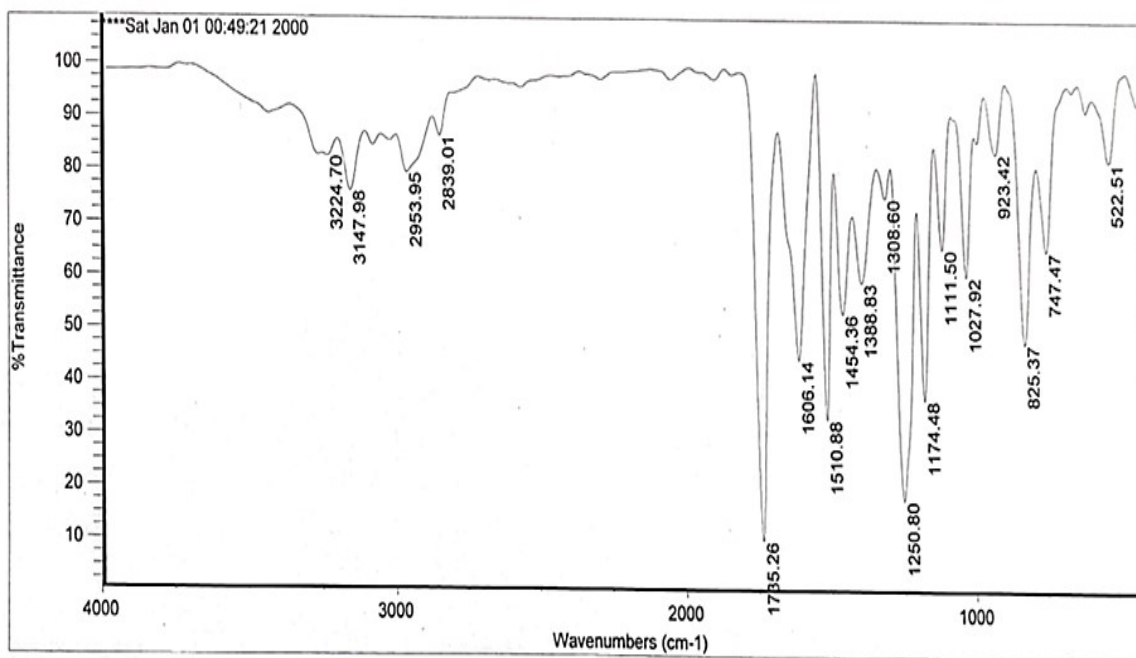

**Figure 14:** FT-IR spectrum of 1-(4-Methoxyphenyl)-1,2-dihydro-naphtho[1,2-e][1,3]oxazin-3-one (**4g**) in KBr.

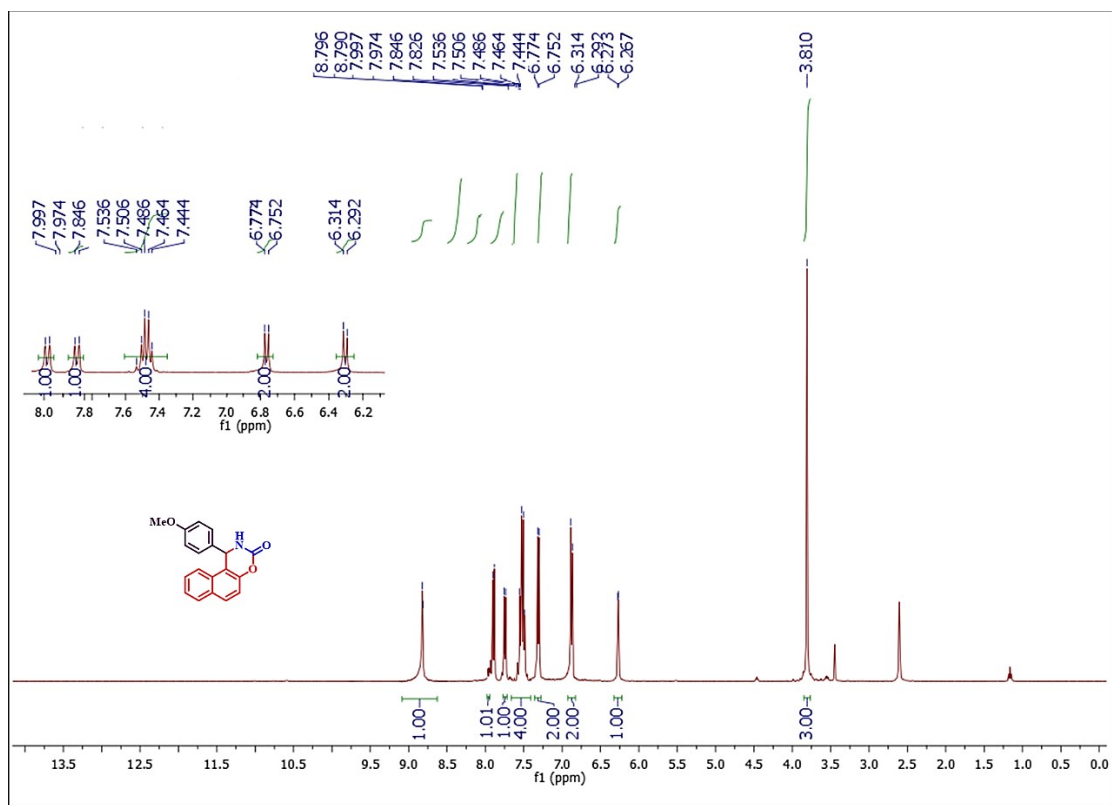

**Figure 15:** <sup>1</sup>H NMR spectrum (400 MHz) of 1-(4-Methoxyphenyl)-1,2-dihydro-naphtho[1,2-e][1,3]oxazin-3-one (**4g**) in DMSO.

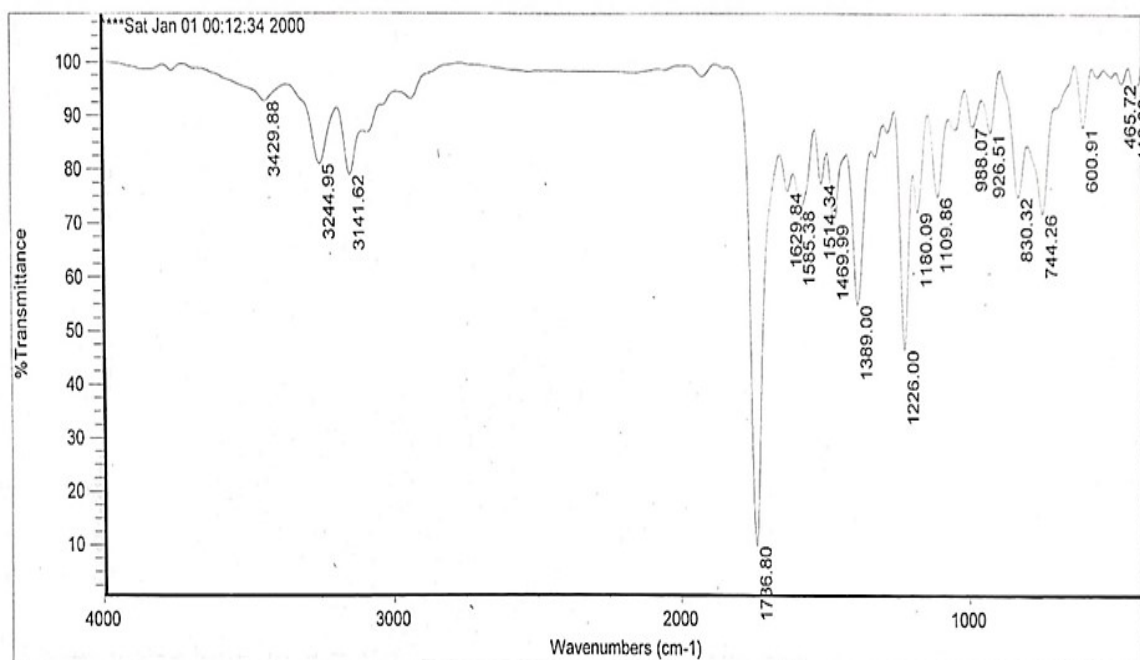

**Figure 16:** FT-IR spectrum of 1-(2,4-Dichlorophenyl)-1,2-dihydro-naphtho[1,2-e][1,3]oxazin-3-one (**4h**) in KBr.

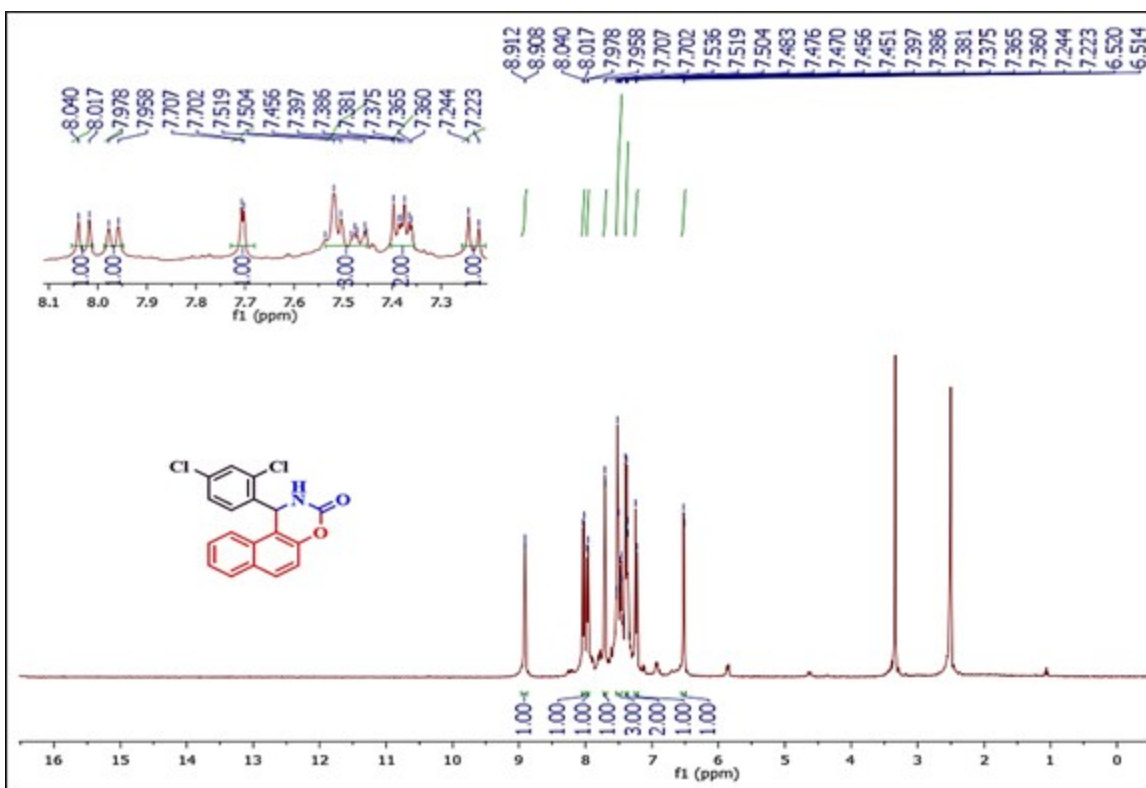

**Figure 17:** <sup>1</sup>H NMR spectrum (400 MHz) of 1-(2,4-Dichlorophenyl)-1,2-dihydronaphtho[1,2-e][1,3]oxazin-3-one (4h) in DMSO.

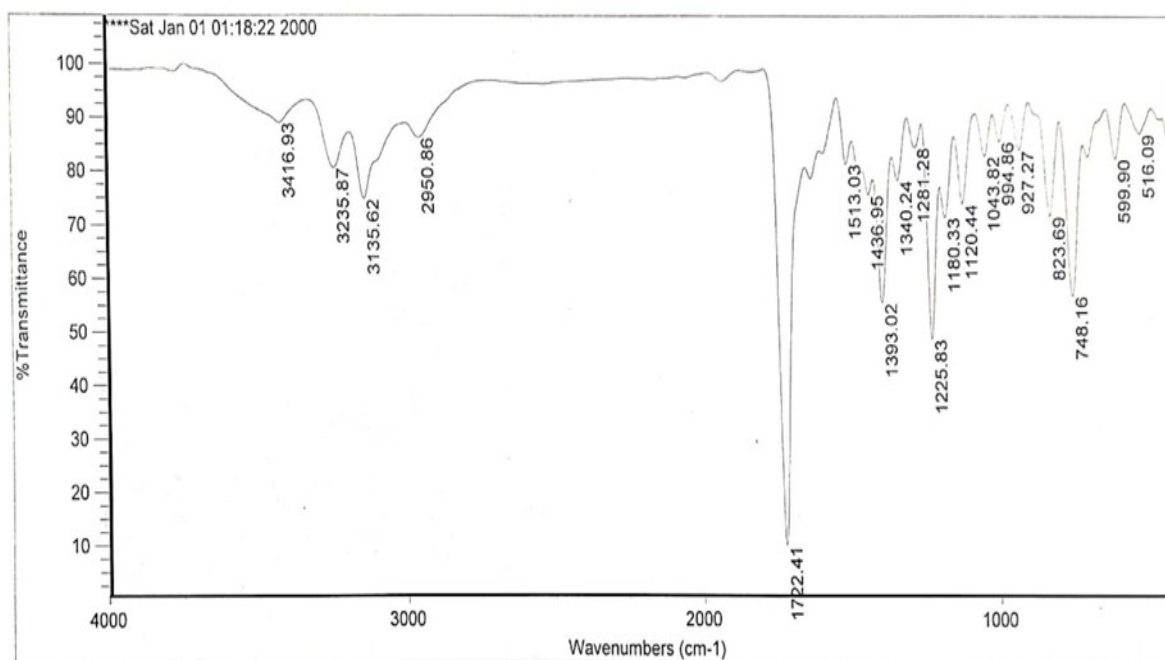

**Figure 18:** FT-IR spectrum of 1-(2-Chlorophenyl)-1,2-dihydronaphtho [1,2-e][1,3] oxazin-3-one (4i) in KBr.

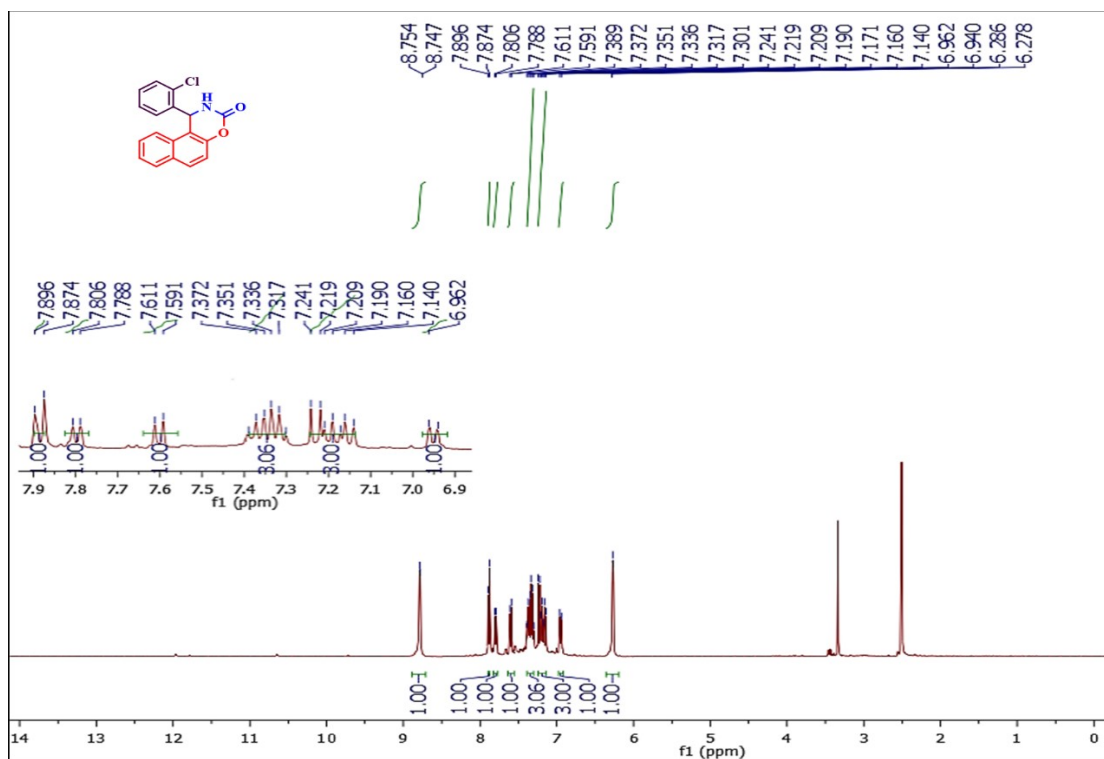

**Figure 19:** <sup>1</sup>H NMR spectrum (400 MHz) of 1-(2-Chlorophenyl)-1,2-dihydronaphtho [1,2-e][1,3] oxazin-3-one (**4i**) in DMSO.

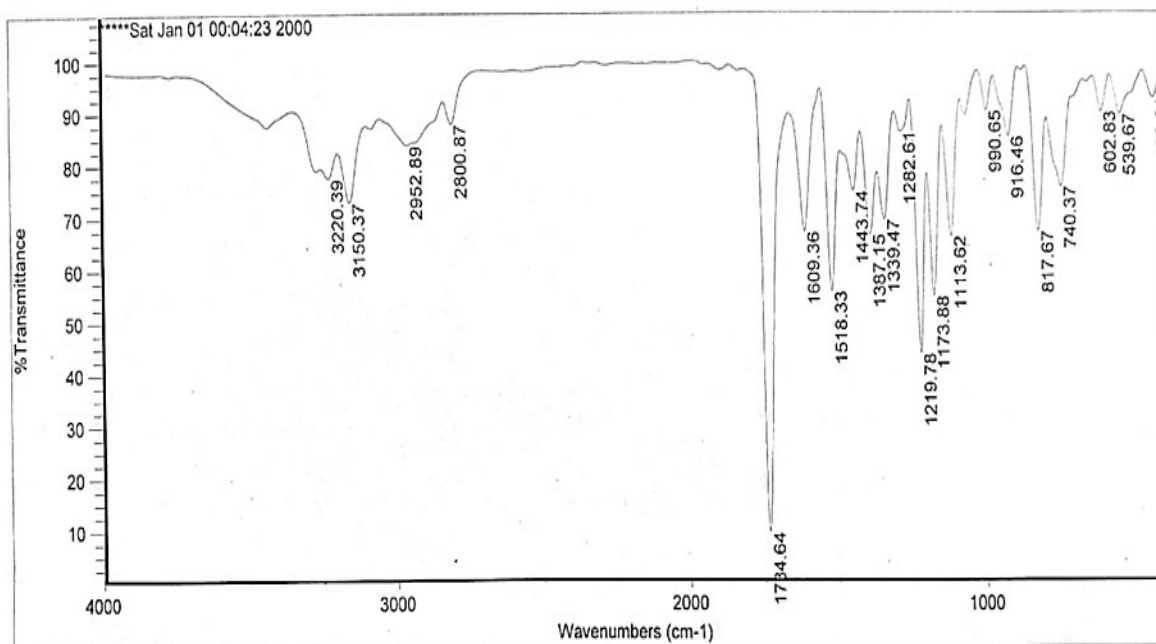

**Figure 20:** FT-IR spectrum of 1-(4-dimethylaminophenyl)-1,2-dihydronaphtho [1,2-e][1,3] oxazin-3-one (**4j**) in KBr.

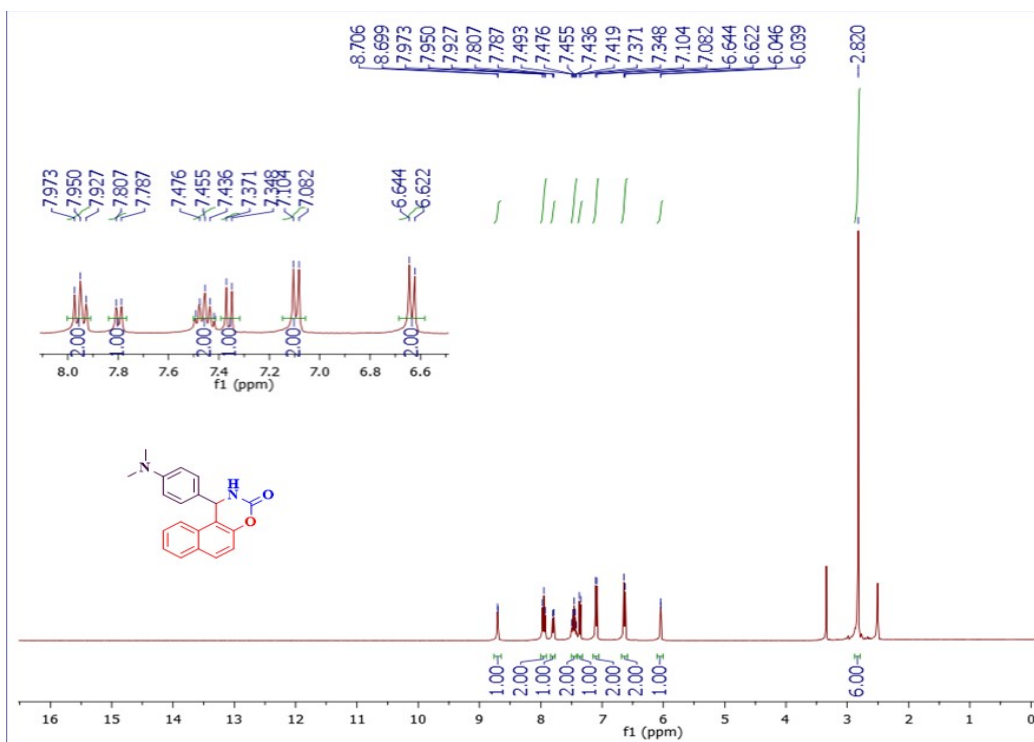

**Figure 21:** <sup>1</sup>H NMR spectrum (400 MHz) of 1-(4-dimethylaminophenyl)-1,2-dihydronaphtho[1,2-e][1,3]oxazin-3-one (4j) in DMSO.

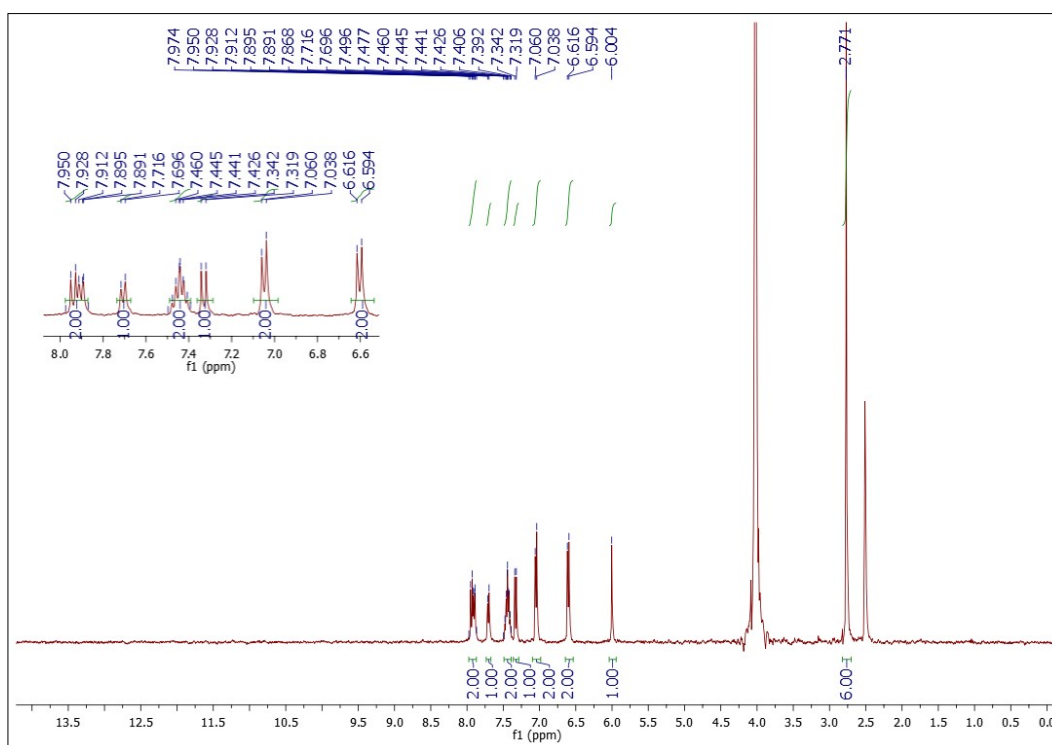

**Figure 22:** <sup>1</sup>H NMR spectrum (400 MHz) of 1-(4-dimethylaminophenyl)-1,2-dihydronaphtho[1,2-e][1,3]oxazin-3-one (4j) in D<sub>2</sub>O.

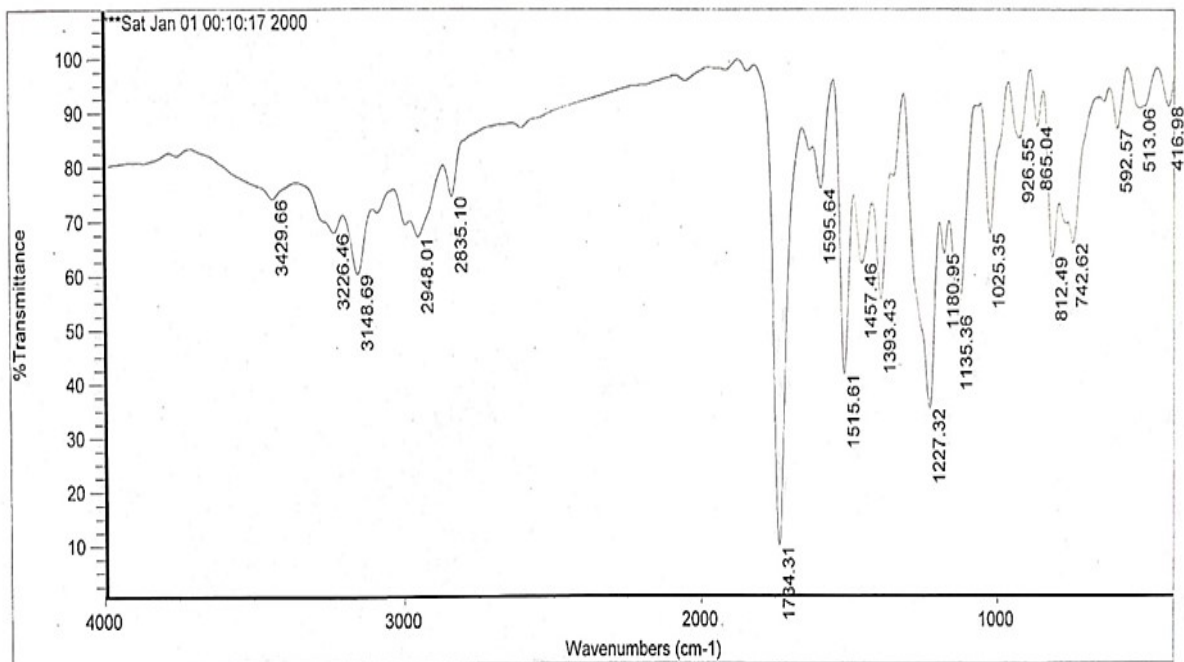

**Figure 23:** FT-IR spectrum of 1-(3,4-Dimethoxyphenyl)-1,2-dihydro-naphtho[1,2-e][1,3]oxazin-3-one (**4k**) in KBr.

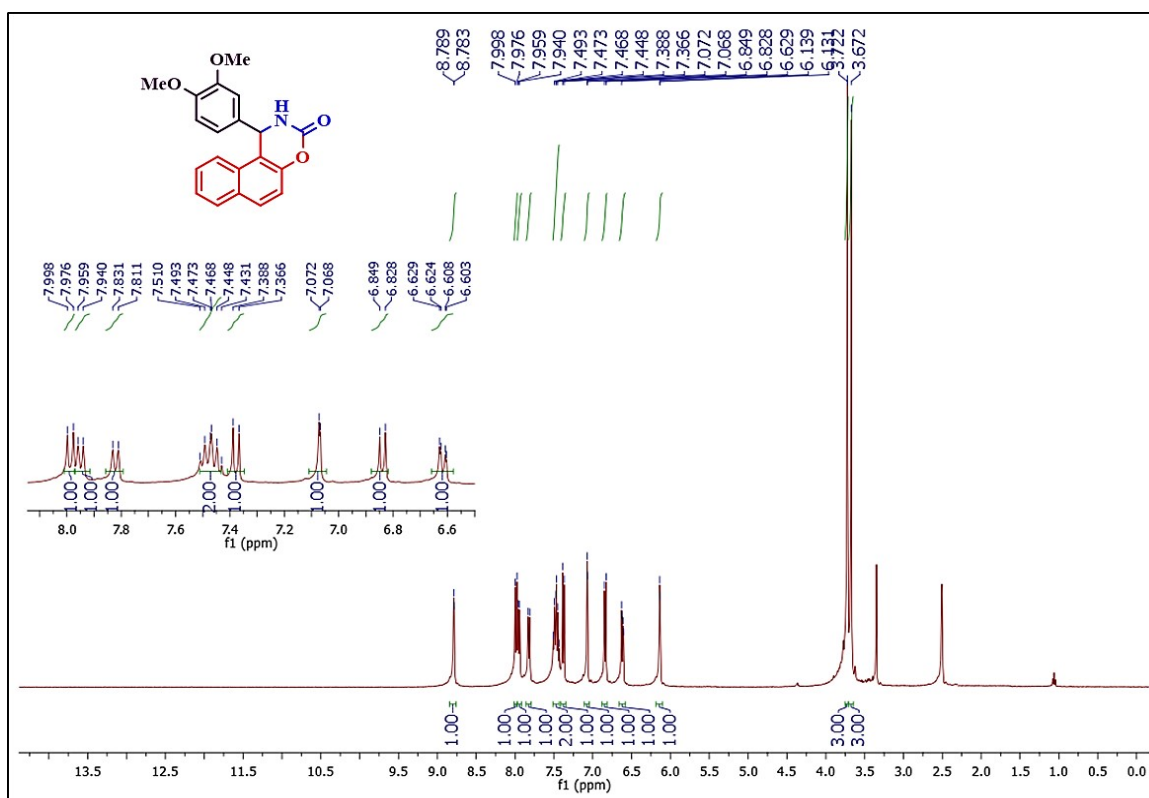

**Figure 24:** <sup>1</sup>H NMR spectrum (400 MHz) of 1-(3,4-Dimethoxyphenyl)-1,2-dihydro-naphtho[1,2-e][1,3]oxazin-3-one (**4k**) in DMSO.

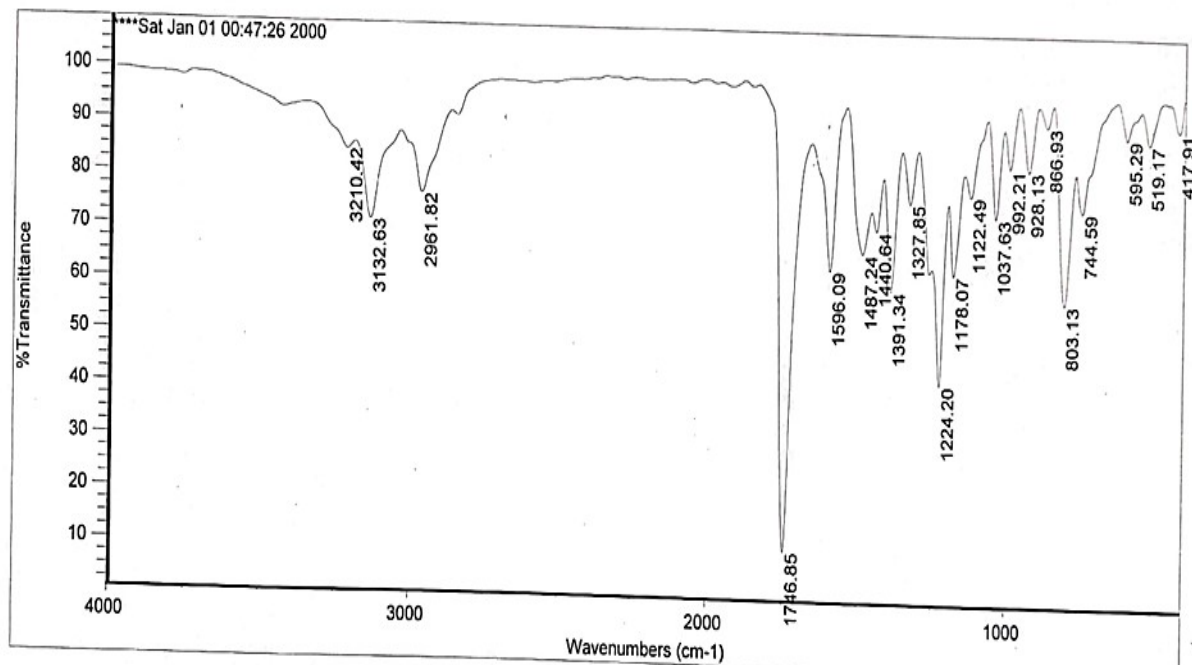

**Figure 25:** FT-IR spectrum of 1-(3-Methoxyphenyl)-1,2-dihydro-naphtho[1,2-e][1,3] oxazin-3-one (**4I**) in KBr.

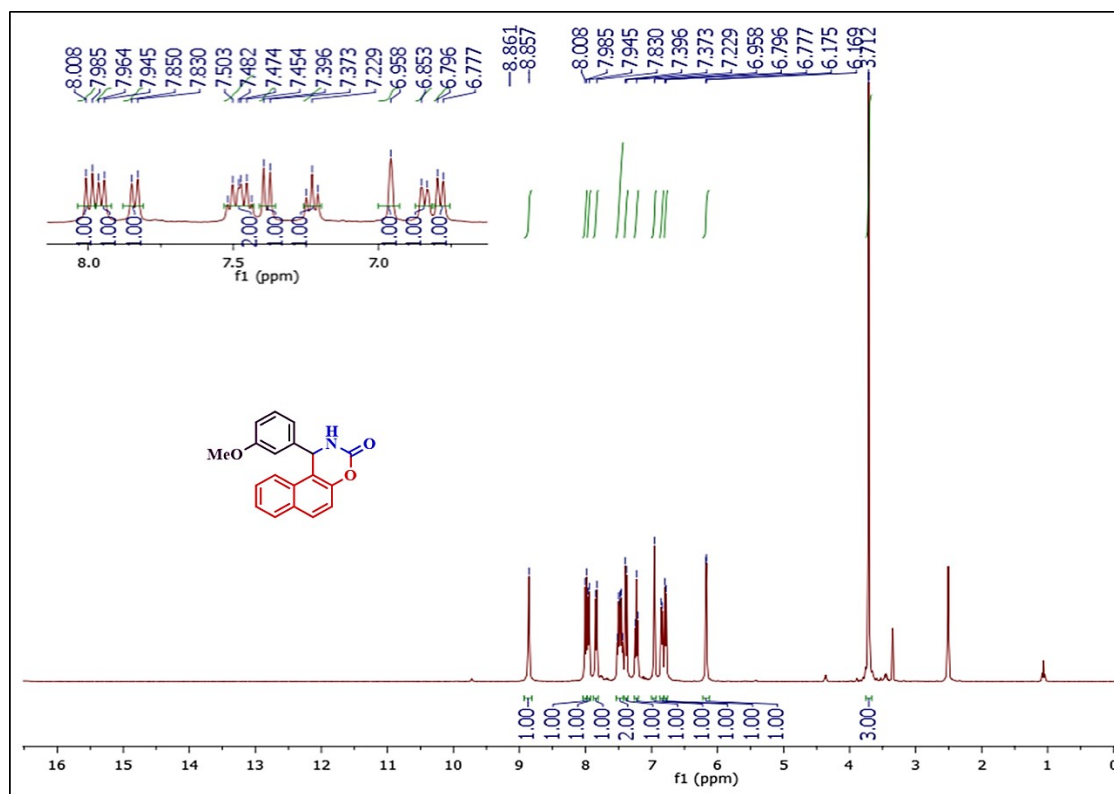

**Figure 26:**  $^1\text{H}$  NMR spectrum (400 MHz) of 1-(3-Methoxyphenyl)-1,2-dihydro-naphtho[1,2-e][1,3] oxazin-3-one (**4I**) in DMSO.
